# Supplementary material
Source: publisher figshare collection journal article supplement (https://future-science-group.figshare.com/articles/dataset/_/20257908)
Supplement: Supplementary file 1 [file 1]

Molecular Dynamics Conformations of Compound 3r12

Time = 0.000 ps

Time = 0.500 ps

Time = 1.000 ps

Time = 1.500 ps

Time = 2.000 ps
